# Supplementary material for: Lessons learnt from a 2017 Irish national clinical claims review: a retrospective observational study
Source: PubMed Central journal article supplement — BMJ Open Qual. 2024 Sep 3;13(3):e002688. doi: 10.1136/bmjoq-2023-002688 (PMC11409236; doi:10.1136/bmjoq-2023-002688), 2024-09-03
Supplement: bmjoq-13-3-s001.pdf [file bmjoq-13-3-s001.pdf]

## Appendix 1

### Healthcare Patient Related Finalised Claims Analysis Template

|                                                                                                                                 |                                      |
|---------------------------------------------------------------------------------------------------------------------------------|--------------------------------------|
| NIMS Record Number:                                                                                                             |                                      |
| Date of incident:                                                                                                               |                                      |
| Previously reported as an incident:                                                                                             |                                      |
| Location (primary) (Level E):                                                                                                   |                                      |
| Other locations:                                                                                                                |                                      |
| Date of birth:                                                                                                                  |                                      |
| Gender:                                                                                                                         | M F                                  |
| Claim related specialty:                                                                                                        |                                      |
| Fatal/<br>Non-fatal injury:                                                                                                     | Fatal: Yes No<br>Non-fatal: Yes No   |
| Injury details:                                                                                                                 |                                      |
| Classification of injury:                                                                                                       |                                      |
| Type of injury:                                                                                                                 |                                      |
| Open Disclosure Undertaken?<br>ie. Is there a letter of apology?<br>Is there a statement around the disclosure of the incident? | Yes No Not Known<br>Yes No<br>Yes No |
| Summary of Incident:                                                                                                            |                                      |

| Question                                                                              | Format of answer                                          | Comments |
|---------------------------------------------------------------------------------------|-----------------------------------------------------------|----------|
| 1. Who else was injured / harmed?                                                     | No other injured<br>Employee<br>Member of public<br>Other |          |
| 2. Who was involved?                                                                  | Medical<br><br><br>Nursing<br><br><br>AHP                 |          |
| 3a. Was there an investigation/<br>review undertaken?<br><br><br>3b. Is it available? | Yes<br>No<br><br>Yes<br>No                                |          |

| Question                                                                                                                                                                                                                                                                                                                                                                         | Format of answer              | Information to inform Answer (from YCF Framework 2017) For Example                                                                                                                                                                                                                                                                                                                                                                                                                                                                                                                                                                                                                                                                                                                                                                                                                                                               | Comments |
|----------------------------------------------------------------------------------------------------------------------------------------------------------------------------------------------------------------------------------------------------------------------------------------------------------------------------------------------------------------------------------|-------------------------------|----------------------------------------------------------------------------------------------------------------------------------------------------------------------------------------------------------------------------------------------------------------------------------------------------------------------------------------------------------------------------------------------------------------------------------------------------------------------------------------------------------------------------------------------------------------------------------------------------------------------------------------------------------------------------------------------------------------------------------------------------------------------------------------------------------------------------------------------------------------------------------------------------------------------------------|----------|
| 4. Service user factors – condition (complexity and seriousness)                                                                                                                                                                                                                                                                                                                 | Yes No<br>Maybe<br>Don't know | Clinical Condition: <ul style="list-style-type: none"> <li>• Pre-existing co-morbidity</li> <li>• Complexity of condition</li> <li>• Seriousness of condition</li> <li>• Limited options available to treat condition</li> <li>• Disability</li> </ul>                                                                                                                                                                                                                                                                                                                                                                                                                                                                                                                                                                                                                                                                           |          |
| 5. Service user factors - Language and communication                                                                                                                                                                                                                                                                                                                             | Yes<br>No Maybe<br>Don't know | Service User Factors – for example: <ul style="list-style-type: none"> <li>• Language barrier</li> <li>• Uncooperative</li> <li>• Complex medical history</li> <li>• Cognitive factors</li> <li>• Intoxicated</li> </ul>                                                                                                                                                                                                                                                                                                                                                                                                                                                                                                                                                                                                                                                                                                         |          |
| 6. Task and Technology factors - Task design and clarity of structure<br><br><i>Delay / failure to monitor</i><br><br><i>Delay / failure in undertaking clinical risk assessment, including falls and/or bone health risk</i><br><br><i>Delay / failure to diagnose / treat</i><br><br><i>Ineffective treatment, including appropriate care planning, medication review etc.</i> | Yes<br>No Maybe<br>Don't know | Procedural or Task Design – for example: <ul style="list-style-type: none"> <li>• Poorly designed (i.e. Too complex; too much info.; difficult to conceive or remember)</li> <li>• Guidelines do not enable one to carry out the task as intended.</li> <li>• Too many tasks to perform at the same time</li> <li>• Contradicting tasks</li> <li>• Staff do not agree with the 'task / procedure design'</li> <li>• Stages of the task not designed so that each step can realistically be carried out</li> <li>• Lack of direct or understandable feedback from the task</li> <li>• Misrepresentation of information</li> <li>• Inappropriate transfer of processes from other situations</li> <li>• Inadequate Audit, Quality control, Quality Assurance built into the task design</li> <li>• Insufficient opportunity to influence task / outcome where necessary</li> <li>• Appropriate automation not available</li> </ul> |          |

|                                                                                                                                                                            |                                              |                                                                                                                                                                                                                                                                                                                                          |  |
|----------------------------------------------------------------------------------------------------------------------------------------------------------------------------|----------------------------------------------|------------------------------------------------------------------------------------------------------------------------------------------------------------------------------------------------------------------------------------------------------------------------------------------------------------------------------------------|--|
| <p>7. Task and Technology factors - Availability and use of protocols</p> <p><i>Ineffective treatment, including appropriate care planning, medication review etc.</i></p> | <p>Yes</p> <p>No Maybe</p> <p>Don't know</p> | <p>Local Policies, Protocols, Procedures, Guidelines (PPGS)- for example:</p> <ul style="list-style-type: none"> <li>• No PPGS exist</li> <li>• PPGS too complicated</li> <li>• Lack of standardisation <ul style="list-style-type: none"> <li>• Contradictory PPGS exist</li> </ul> </li> <li>• PPGS inadequate / incomplete</li> </ul> |  |
|----------------------------------------------------------------------------------------------------------------------------------------------------------------------------|----------------------------------------------|------------------------------------------------------------------------------------------------------------------------------------------------------------------------------------------------------------------------------------------------------------------------------------------------------------------------------------------|--|

|                                                                                                                                                                   |                                              |                                                                                                                                                                                                                                                                                                                                                                                                                                                                                                                                                                                                                                                                                              |  |
|-------------------------------------------------------------------------------------------------------------------------------------------------------------------|----------------------------------------------|----------------------------------------------------------------------------------------------------------------------------------------------------------------------------------------------------------------------------------------------------------------------------------------------------------------------------------------------------------------------------------------------------------------------------------------------------------------------------------------------------------------------------------------------------------------------------------------------------------------------------------------------------------------------------------------------|--|
| <p>8. Task and Technology factors - Availability and accuracy of test results</p> <p><i>Delay / failure to act on formal result</i></p>                           | <p>Yes</p> <p>No Maybe</p> <p>Don't know</p> | <p>Administrative factors – for example:</p> <ul style="list-style-type: none"> <li>• Unreliable or ineffective general administrative systems (Please specify e.g. : Bookings, Patient identification, ordering, requests, referrals, appointments)</li> <li>• Unreliable or ineffective administrative infrastructure (e.g. Phones, bleep systems etc.)</li> <li>• Unreliable or ineffective administrative support</li> </ul> <p>Support from other departments:<br/>This includes support from IT, HR, porters, clinical services such as radiology, phlebotomy, pharmacy, biochemistry, blood bank, physiotherapy, medical or surgical subspecialties, theatres, GP, ambulance.....</p> |  |
| <p>9. Individual (staff) factors - Knowledge and skills</p> <p><i>Delay / failure to recognise complication? i.e. post fall protocols</i></p>                     | <p>Yes</p> <p>No Maybe</p> <p>Don't know</p> | <p>Staff Training and Education – For example:</p> <ul style="list-style-type: none"> <li>• Inadequate training</li> <li>• No protected time for teaching</li> <li>• Training not standardised</li> <li>• No regular / yearly updates</li> </ul>                                                                                                                                                                                                                                                                                                                                                                                                                                             |  |
| <p>10. Individual (staff) factors – Competence</p> <p><i>Delay / failure to recognise complication? i.e. post fall protocols</i></p>                              | <p>Yes</p> <p>No Maybe</p> <p>Don't know</p> | <p>Task Characteristics – For example:</p> <ul style="list-style-type: none"> <li>• Unfamiliar task</li> <li>• Difficult task</li> <li>• Monotonous task</li> <li>• Inadequate experience / qualifications</li> </ul>                                                                                                                                                                                                                                                                                                                                                                                                                                                                        |  |
| <p>11. Team factors - Verbal communication</p> <p><i>Failure / inadequate provision of information such as falls prevention booklet, SU instructions etc.</i></p> | <p>Yes</p> <p>No Maybe</p> <p>Don't know</p> | <p>Communication – Verbal e.g.:</p> <ul style="list-style-type: none"> <li>• Poor communication between staff</li> <li>• Handover problems</li> <li>• Lack of communication / notes</li> <li>• Inappropriate abbreviations used</li> <li>• Unable to contact correct staff</li> </ul>                                                                                                                                                                                                                                                                                                                                                                                                        |  |

|                                                                                                                                                                                                                    |                                              |                                                                                                                                                                                                                                                                                                                                                                                                                            |  |
|--------------------------------------------------------------------------------------------------------------------------------------------------------------------------------------------------------------------|----------------------------------------------|----------------------------------------------------------------------------------------------------------------------------------------------------------------------------------------------------------------------------------------------------------------------------------------------------------------------------------------------------------------------------------------------------------------------------|--|
| <p>12. Team factors - Written communication</p> <p><i>Failure / inadequate provision of information such as falls prevention booklet, SU instructions etc.</i></p> <p><i>Inadequate clinical documentation</i></p> | <p>Yes</p> <p>No Maybe</p> <p>Don't know</p> | <p>Communication – Written e.g.:</p> <ul style="list-style-type: none"> <li>• Poor communication between staff</li> <li>• Handover problems</li> <li>• Lack of communication / notes</li> <li>• Unable to read notes</li> <li>• Inappropriate abbreviations used</li> <li>• Unable to contact correct staff</li> <li>• Notes availability</li> </ul>                                                                       |  |
| <p>13. Team factors - Supervision and seeking help</p> <p><i>Delay / failure to call senior decision maker</i></p>                                                                                                 | <p>Yes</p> <p>No Maybe</p> <p>Don't know</p> | <p>Safety Culture – For example: -</p> <ul style="list-style-type: none"> <li>• Service User Safety awareness</li> <li>• Fear of documenting errors</li> <li>• Attitude to Risk Management</li> <li>• Availability of senior decision makers / support</li> </ul>                                                                                                                                                          |  |
| <p>14. Team factors - Team structure (congruence, consistency, leadership etc.)</p>                                                                                                                                | <p>Yes</p> <p>No Maybe</p> <p>Don't know</p> | <p>Team Factors – For example:</p> <ul style="list-style-type: none"> <li>• Conflicting team goals</li> <li>• Lack of respect for colleagues</li> <li>• Poor delegation</li> <li>• Absence of feedback</li> </ul> <p>Leadership, Supervision &amp; Roles – for example:</p> <ul style="list-style-type: none"> <li>• Inappropriate delegation</li> <li>• Unclear responsibilities</li> <li>• Remote supervision</li> </ul> |  |
| <p>15. Work environmental factors - Workload and shift patterns</p>                                                                                                                                                | <p>Yes</p> <p>No Maybe</p> <p>Don't know</p> | <p>Workload &amp; Staffing issues – For example:</p> <ul style="list-style-type: none"> <li>• High unit workload</li> <li>• Insufficient staff</li> <li>• Unable to contact staff</li> <li>• Staff sickness</li> </ul>                                                                                                                                                                                                     |  |
| <p>16. Work environmental factors - Design, availability and maintenance of equipment</p> <p><i>Defective equipment</i></p>                                                                                        | <p>Yes</p> <p>No Maybe</p> <p>Don't know</p> | <p>Medicines, Equipment &amp; Supplies – for example:</p> <ul style="list-style-type: none"> <li>• Unavailable medicines</li> <li>• Equipment not working</li> <li>• Inadequate maintenance</li> <li>• No supplies / delivery issues</li> </ul>                                                                                                                                                                            |  |

Issues Identified:

**Opportunities for Improvement:**

*(Aligned with national and international evidence)*

Resources Used:

|                    |     |    |
|--------------------|-----|----|
| Healthcare Record: | Yes | No |
| Expert Reports:    | No: |    |

CRA: \_\_\_\_\_

Date: \_\_\_\_\_/\_\_\_\_\_/\_\_\_\_\_
