# Supplementary material for: Lessons learnt from a 2017 Irish national clinical claims review: a retrospective observational study
Source: PubMed Central journal article supplement — BMJ Open Qual. 2024 Sep 3;13(3):e002688. doi: 10.1136/bmjoq-2023-002688 (PMC11409236; doi:10.1136/bmjoq-2023-002688), 2024-09-03
Supplement: bmjoq-13-3-s002.pdf [file bmjoq-13-3-s002.pdf]

## Appendix 2

Health Service Executive (HSE) Risk Impact Table as outlined in the HSE National Safety Incident Management Policy (2018).

| <b>Outcome at the time of incident reporting</b>       | <b>Severity Rating</b> |
|--------------------------------------------------------|------------------------|
| 1 No adverse outcome                                   | Negligible             |
| 2 Injury not requiring first aid                       | Negligible             |
| 3 Injury or illness, requiring first aid               | Minor                  |
| 4 Injury requiring medical treatment                   | Moderate               |
| 5 Long-term disability/incapacity (incl. psychosocial) | Major                  |
| 6 Permanent incapacity (incl. psychosocial)            | Extreme                |
| 7 Death                                                | Extreme                |
